# Supplementary material for: Use of GPCC and GPCP Precipitation Products and GRACE and GRACE-FO Terrestrial Water Storage Observations for the Assessment of Drought Recovery Times
Source: Copernicus journal article supplement (doi:10.5194/egusphere-2024-2616), 2024-09-03
Supplement: Supplementary file [file egusphere-2024-2616-RC2-supplement.pdf]

----- REVIEW REPORT-----

TITLE: Use of GPCC and GPCP Precipitation Products and GRACE and GRACE-FO Terrestrial Water Storage Observations for the Assessment of Drought Recovery Times

AUTHORS: Çağatay Çakan, M. Tuğrul Yılmaz, Henryk Dobslaw, E. Sinem Ince, Fatih Evrendilek, Christoph Förste, Ali Levent Yagci

Rating at 1 to 4 scale, 1 means excellent and 4 means poor score:

----- Scientific significance -----

SCORE: 2 (Good)

----- Scientific quality-----

SCORE: 2 (Good)

----- Presentation quality-----

SCORE: 2 (Good)

----- Overall Rating -----

SCORE: 2 (Good)

----- Guidance -----

**This paper is accepted to subject a minor revision:**

The study is well-organized and innovative, with its originality stemming from the use of GRACE and GRACE-FO terrestrial water storage (TWS) data as an independent approach for evaluating the accuracy of precipitation products. The authors computed Drought Recovery Times (DRT) from Total Water Storage Anomaly (TWSA) data using two different approaches. The first approach, referred to as the "storage deficit" method, relies solely on TWSA data, while the second, the "required precipitation amount" method, integrates TWSA with precipitation data. Two TWSA products, JPL and G3P, were utilized for these calculations. Additionally, the authors evaluated the discrepancies in DRT results between the two TWSA products. I have only a few minor comments for the authors may consider:

**Minor Comments:**

- Line 285 : Which correlation method did you use, Can you please name it? (e.g. Pearson's correlation)
- Line 298 : Please verify the figure numbers, as they might need to be labeled as 2b and 2d
- The paper uses numerous abbreviations and technical terms, so it is recommended to include a glossary of full forms for the abbreviations after the conclusion.

Overall, this research is well-structured and presents a state-of-the-art contribution to hydrology by highlighting the potential of GRACE and GRACE-FO data in evaluating precipitation products and drought characteristics. Addressing the minor comments provided will further strengthen the manuscript's impact.
